# Supplementary material for: Sampling and storage conditions influencing the measurement of parathyroid hormone in blood samples: a systematic review
Source: publisher site journal article supplement (doi:10.1515/cclm-2013-0315), 2013-09-26
Supplement: Supplementary file 1 [file Supplemental_data_table_7__09062013.doc]

Supplemental Data Table 7: Summary of included studies on the seasonal variation of PTH

ICMA: immunochemiluminometric assay; IRMA: immunoradiometric assay; PTH: parathyroid hormone, RIA: radioimmunoassay

| **Reference** | **Population type/country** | **Sample type** | **Experimental paradigm** | **Assay (manufacturer)** | **Statistical analysis** | **Overall conclusion** |
| --- | --- | --- | --- | --- | --- | --- |
| Guagnano *et al*, 1983, 58 | n=4 healthy male volunteers; Italy | Serum | Blood collected 6 times per day and every other month for 1 year | Not stated | Cosinor analysis | No circannual rhythm for PTH |
| Guillemant *et al*, 1995, 57 | n=28 Caucasian growing males, healthy volunteers; n=39 healthy adult male volunteers (control); France | Serum | 2 time points: March and September | IRMA (Nichols Institute) | Student’s paired t-test | Increased PTH in winter; Mean PTH concentration 3.2 pmol/L (March) and 2.4 pmol/L (September) |
| Krall *et al*,1989, 59 | n=333 healthy postmenopausal female volunteers; USA | Serum | Recruitment throughout the year, Volunteers studied once before entry into the trial. Three seasonal divisions: months of high serum 25-hydroxyvitaminD (August, September and October), months of low concentration (March, April and May) and the remaining months (June, July, November to February) | IRMA (Nichols Institute) | Tukey’s test and Pearson product-moment correlation coefficients | In patients with low vitamin D intake (≤220 IU), [PTH] was higher between March-May compared to August-October (3.9 pmol/L vs 3.2 pmol/L). This was not observed in patients with high vitamin D intake (>220 IU). Inverse relationship between PTH and vitamin D concentrations (low vitamin D intake group). |
| Lips *et al*, 1983, 54 | n=124 patients with femoral neck fracture, n=74 healthy volunteers; The Netherlands | Serum | Sample taken only once per subject | RIA (In house) | Statistical evaluation of seasonal variation was by means of analysis of variance with age and sex as covariates | Seasonal variation observed for PTH , but no difference between patient groups; higher [PTH] in winter |
| Meller et al, 1986, 55 | n=41 patients with long bone fractures or hip fractures; Israel | Serum | Samples taken 48 h after hospital admission and before operative intervention | RIA (described in Arnaud et al, with modifications) | Not stated | Seasonal rhythm of PTH. [PTH] was increased by 31% in winter (October-March) compared to summer (April-September) |
| Woitge *et al*, 2000, 56 | n=41 healthy volunteers, males and females; Germany | Serum | Blood taken at the same time during each visit, samples processed within 3 h of collection and stored at -80oC until analysis | ICMA (Ciba) | Kruskal-Wallis test or Wilcoxon-Mann-Whitney U test to test for differences. Rhythm analysis using Pharmfit method | PTH seasonal rhythm identified with a peak in January (premenopausal females), February (postmenopausal females); No significant peak in males; mesor increased by 17.7% in premenopausal females and 5% in postmenopausal females compared to males |
